# Supplementary material for: Autism Spectrum Disorder: Incidence and Time Trends Over Two Decades in a Population-Based Birth Cohort
Source: Springer Nature journal article supplement (doi:10.1007/s10803-018-3834-0), 2018-12-05
Supplement: MOESM4 [file 16318600]

**Online Resource 3:**  Operational DSM-IV-TR based ASD-RI criteria chart

**Article Title:** Autism Spectrum Disorder: Incidence and Time Trends Over Two Decades in a Population-Based Birth Cohort

**Journal:** Journal of Autism and Developmental Disorders

**Authors:** Scott M. Myers, Robert G. Voigt, Robert C. Colligan, Amy L. Weaver, Curtis B. Storlie, Ruth E. Stoeckel, John D. Port,

Slavica K. Katusic

**Corresponding author:** Scott M. Myers, MD, Geisinger Autism & Developmental Medicine Institute, Lewisburg, PA 17837.

Email: smyers1@geisinger.edu; Telephone: (570) 522-9430.

Online Resource 3. Operational DSM-IV-TR based ASD-RI Criteria Chart

SOCIAL COMMUNICATION BEHAVIOR

**12.0** Persistent preoccupation with object parts

12.1 General focus on parts of objects (the components) rather than appreciation of the whole

12.2 Manipulates toy parts (car doors, doll eyes, wheels)

12.3 Disassembles things

**11.0** Body movements, repetitive motor mannerisms

11.1 Finger / hand flapping, shaking, clapping, waving, wringing, flicking, tapping, wiggling, twirling/shaking objects

11.2 Spinning or rocking body for long periods of time

11.3 Walking/running in specific pattern, on tip-toe, pacing, circling

11.4 Other stereotypical motor behaviors: sucking or picking skin, head banging if not occurring when angry

(code **11.4a** if context of head banging is self-injurious)

**10.0** Routines, ritualistic behavior, insists on sameness

10.1 Needs to do things in exact order per routine, non-functional rituals, or timing

10.2 Inflexible to change in routine, ritual or timing (becomes upset, anxious, or frustrated)

10.3 Insistence on sameness

**9.0** Preoccupied, obsessive or narrow focus of interest

9.1 Intense preoccupation, fascination, obsession for a certain activity, object, or topic; memorization of numbers, dates, text (code **9.1a** if fascination specifically lights, spinning objects, sounds, or tactile obsession)

9.2 Restrictive / limited pattern of interest

9.3 Unusual topic of interest or attention to detail

9.4 Perseverates on activity over & over, repetition

**4.0** Lacks social reciprocity or emotional give & take

4.1 Oblivious / non-interactive / aloof / acts deaf

4.2 Limited reciprocal interactions / withdrawn, disconnected / treats others as objects

4.3 Inappropriate interactions / socially immature, odd or awkward / indiscriminate

4.4 Does not notice emotions of others or offer comfort / lack of empathy / lack of perspective

**1.0** Non-verbal impairment

1.1 Problem with eye contact/gaze

1.2 Impaired facial expression/use & understanding

1.3 Impaired body language/use & understanding

1.4 Impaired gesture/use & understanding

**2.0** Interaction, peer relationship difficulties

2.1 Plays alone, no interest in other kids, loner

2.2 Few/no close friends/friendship struggles

2.3 Relationships only with younger/older

2.4 Trouble interacting with groups

2.5 Interacts only with peers of similar interests

2.6 Naïve or victim of bullying

**3.0** Does not share interests or enjoyment

3.1 Won’t show/bring objects of interest to others

3.2 Does not call attention to his/her activities/ achievements

3.3 Little interest in praise

3.4 Lack pointing to draw attention (protodeclarative pointing)

3.5 Lack of sharing joyful or positive affect

3.6 Lack of "joint attention", phrase alone (if additional description with "joint attention", ask team)

**7.0** Unusual or repetitive language pattern

7.1 Echolalia – repeating what others say (including script from books, movies, etc.)

7.2 Repetitious/perseverative speech

7.3 Idiosyncratic language, pronoun reversal, metaphorical speech, speaking in 3rd person, special meaning only to them

7.4 Formal, little professor, pedantic (know-it-all)

7.5 Unusual tone, sing-song, high pitch, prosodic, inappropriate giggling, voices/utterances

**6.0** Adequate speech but impaired conversation

6.1 Impaired pragmatic (social) language (difficulty starting/sustaining/ending conversation)

6.2 Difficulty understanding of figures of speech / literal/ concrete

6.3 Speaks in a monologue, little back & forth, one-sided conversation

**5.0** Delay or lack of language development

5.1 Delayed speech and/or language development

5.2 No functional speech or language whatsoever

**8.0** Inappropriate play per age level

8.1 Does not play with toys as intended; play is limited, abnormal, or mechanical

8.2 Minimal imaginative, creative, make-believe, or social imitative play

**13**

1. Self-Abuse

2. Abnormal Sensory Response

3. Phobias

4. PICA

5. Environment sensitivity

6. Poor organizational skills

7. Tantrums

8. Lack of common sense
