# Supplementary material for: Autism Spectrum Disorder: Incidence and Time Trends Over Two Decades in a Population-Based Birth Cohort
Source: Springer Nature journal article supplement (doi:10.1007/s10803-018-3834-0), 2018-12-05
Supplement: MOESM7 [file 16318600]

**Online Resource 6:**  2011 Cumulative incidence of ASD-C (%) compared to previously reported ASD prevalence (%) by 3-year birth cohort.

**Article Title:** Autism Spectrum Disorder: Incidence and Time Trends Over Two Decades in a Population-Based Birth Cohort

**Journal:** Journal of Autism and Developmental Disorders

**Authors:** Scott M. Myers, Robert G. Voigt, Robert C. Colligan, Amy L. Weaver, Curtis B. Storlie, Ruth E. Stoeckel, John D. Port, Slavica K. Katusic

**Corresponding author:** Scott M. Myers, MD, Geisinger Autism & Developmental Medicine Institute, Lewisburg, PA 17837. Email: smyers1@geisinger.edu; Telephone: (570) 522-9430.

| **Online Resource 6.** Cumulative Incidence of ASD-C (%) by the Year 2011 Compared to Previously Reported ASD Prevalencea (%) in four 3-Year Birth Cohorts. | | | | |
| --- | --- | --- | --- | --- |
|  | **Birth Years** | | | |
| **1990-1992** | **1993-1995** | **1996-1998** | **1999-2001** |
| Denmarka | 1.09 | 1.51 | 1.47 | 1.36 |
| Swedena | 0.98 | 0.95 | 0.84 | 0.62 |
| Finlanda | 0.78 | 1.06 | 0.95 | 0.80 |
| W. Australiaa | 0.40 | 0.52 | 0.70 | 0.64 |
| ASD-C | 1.08 | 1.37 | 1.61 | 1.75 |
| a Source: Atladottir et al. (2015)  ASD-C Clinically-diagnosed ASD in the present cohort | | | | |
