# Supplementary material for: Autism Spectrum Disorder: Incidence and Time Trends Over Two Decades in a Population-Based Birth Cohort
Source: Springer Nature journal article supplement (doi:10.1007/s10803-018-3834-0), 2018-12-05
Supplement: MOESM8 [file 16318600]

**Online Resource 7:**  ASD annual incidence (age 0-8 years) and cumulative incidence compared to previously reported ASD incidence and prevalence among 8-year-old children in the UK for 2004-2010.

**Article Title:** Autism Spectrum Disorder: Incidence and Time Trends Over Two Decades in a Population-Based Birth Cohort

**Journal:** Journal of Autism and Developmental Disorders

**Authors:** Scott M. Myers, Robert G. Voigt, Robert C. Colligan, Amy L. Weaver, Curtis B. Storlie, Ruth E. Stoeckel, John D. Port, Slavica K. Katusic

**Corresponding author:** Scott M. Myers, MD, Geisinger Autism & Developmental Medicine Institute, Lewisburg, PA 17837. Email: smyers1@geisinger.edu; Telephone: (570) 522-9430.

| **Online Resource 7.** ASD Annual Incidence (age 0-8 years) and Cumulative Incidence Compared to Previously Reported ASD Incidence and Prevalence Among 8-Year-Old Children in the UKa for 2004-2010 | | | | |
| --- | --- | --- | --- | --- |
| **Year** | **Taylor et al (2013) ASD Incidence**  **(per 1000 children)** | **ASD-C**  **Incidence**  **(per 1000 children)** | **Taylor et al (2013) ASD Prevalence (%)** | **ASD-C Cumulative Incidence**  **(%)** |
| 2004 | 0.69 | 1.30 | 0.22 | 0.90 |
| 2005 | 0.70 | 1.54 | 0.23 | 1.06 |
| 2006 | 0.77 | 1.75 | 0.23 | 1.21 |
| 2007 | 0.76 | 1.90 | 0.24 | 1.34 |
| 2008 | 0.72 | 1.97 | 0.24 | 1.44 |
| 2009 | 0.76 | 1.98 | 0.25 | 1.52 |
| 2010 | 0.62 | 1.96 | 0.24 | 1.57 |
| a Source:Taylor et al. (2013)  ASD-C Clinically-diagnosed ASD | | | | |
