# Supplementary material for: Autism Spectrum Disorder: Incidence and Time Trends Over Two Decades in a Population-Based Birth Cohort
Source: Springer Nature journal article supplement (doi:10.1007/s10803-018-3834-0), 2018-12-05
Supplement: MOESM10 [file 16318600]

**ONLINE RESOURCES**

Online Resource 1: Summary of neurodevelopmental/psychiatric disorder (NPD) clustercombinations among individuals in each **PASD** group.

Online Resource 2: ASD Data Dictionary.

Online Resource 3: Operational DSM-IV-TR based ASD-RI criteria chart.

Online Resource 4: ASD annual incidence (age 0-15 years) by calendar year and cumulative incidence by age 15 according to calendar year of research-identified inclusive (ASD-RI) and narrow (ASD-RN) autism spectrum disorder and clinically diagnosed autism spectrum disorder (ASD-C).

Online Resource 5: Cumulative incidence by age 8 of research-identified inclusive (ASD-RI) and narrow (ASD-RN) autism spectrum disorder and clinically diagnosed autism spectrum disorder (ASD-C), according to birth year and averaged across gender.

Online Resource 6: 2011 Cumulative incidence of ASD-C (%) compared to previously reported ASD prevalence (%) by 3-year birth cohort.

Online Resource 7: ASD annual incidence (age 0-8 years) and cumulative incidence compared to previously reported ASD incidence and prevalence among 8-year-old children in the UK for 2004-2010.

Online Resource 8: Cumulative incidence of ASD-RI, ASD-RN, and ASD-C through age 5 (%) compared to previously reported ASD prevalence (%) for birth years 1994-1996.
